# Supplementary material
Source: PubMed Central journal article supplement (PMC8351896)
Supplement: bloodBLD2020008865-suppl1.pdf [file bloodBLD2020008865-suppl1.pdf]

# **Prognostic Impact of Corticosteroids on Efficacy of Chimeric Antigen Receptor T-cell Therapy in Large B-cell Lymphoma**

Strati et al.

## **SUPPLEMENTARY MATERIAL**

### **Supplementary Methods**

#### *Corticosteroid use*

Institutional guidelines were followed for the use of corticosteroids to manage patients with CRS and ICANS (Supplementary Table 1). There were no changes in corticosteroid usage and dosing guidelines at our institution during the course of treatment of patients described in this study.<sup>1</sup>

#### *Correlative analysis*

CAR T-cell amplification was measured in a subgroup of 24 patients on peripheral blood samples collected on day 7, day 14 and day 30 after CAR T-cell infusion by real time PCR, and results were reported as copies per  $\mu\text{g}$  of DNA as previously described.<sup>2</sup> Gene expression signatures of CAR T cell infusion products from the same 24 patients was determined by single cell RNA sequencing, as previously described.<sup>3</sup>

#### *Statistical methods*

Association between categorical variables was evaluated using  $\chi^2$  test or Fisher's exact test. The difference in a continuous variable between patient groups was evaluated by the Mann-Whitney test. Progression-free survival (PFS) was defined as the time from the start of axi-cel infusion to progression of disease, death, or last follow-up (whichever occurred first). Overall survival (OS)

was defined as the time from the start of axi-cel infusion to death or last follow-up. PFS and OS were calculated using Kaplan-Meier estimates and were compared between subgroups using the Gehan-Breslow-Wilcoxon test (to weight more for early events). Cox regression was used for multivariate analysis. A p-value of  $\leq 0.05$  (two-tailed) was considered statistically significant. Statistical analyses were completed using SPSS 24 (IBM) and Prism 8 (GraphPad).

**Supplementary Table 1. Institutional guidelines<sup>1</sup> for use of tocilizumab and corticosteroids for management of CRS and ICANS graded according to ASTCT consensus grading system.<sup>4</sup>**

| <b>CRS Grade</b> | <b>Tocilizumab / Corticosteroid use</b>                                                                                                                                                                                                                                                                                                                                                                                                                                                                                              | <b>ICANS Grade</b> | <b>Tocilizumab / Corticosteroid use</b>                                                                                                                                                                                                                                                                                                                                                                                                                                                                                                     |
|------------------|--------------------------------------------------------------------------------------------------------------------------------------------------------------------------------------------------------------------------------------------------------------------------------------------------------------------------------------------------------------------------------------------------------------------------------------------------------------------------------------------------------------------------------------|--------------------|---------------------------------------------------------------------------------------------------------------------------------------------------------------------------------------------------------------------------------------------------------------------------------------------------------------------------------------------------------------------------------------------------------------------------------------------------------------------------------------------------------------------------------------------|
| Grade 1          | Consider tocilizumab for 1 dose for persistent fever lasting greater than 3 days                                                                                                                                                                                                                                                                                                                                                                                                                                                     | Grade 1            | Dexamethasone 10 mg IV for 1 dose (or methylprednisolone equivalent) and reassess in 6 hours or earlier if clinically indicated<br><br>If associated with concurrent CRS, add tocilizumab                                                                                                                                                                                                                                                                                                                                                   |
| Grade 2          | Administer tocilizumab for 1 dose <b>and</b> consider dexamethasone 4 - 10 mg IV for 1 dose (or methylprednisolone equivalent) and reassess in 6 hours or earlier if clinically indicated<br><br>Tocilizumab may be repeated every 8 hours for up to 3 doses in a 24-hour period                                                                                                                                                                                                                                                     | Grade 2            | Dexamethasone 10 mg IV every 12 hours (or methylprednisolone equivalent)<br><br>If associated with concurrent CRS, add tocilizumab<br><br>Once ICANS improves to Grade 1 or less, taper and/or stop corticosteroids depending on clinical situation                                                                                                                                                                                                                                                                                         |
| Grade 3          | Tocilizumab as in Grade 2 CRS if not administered previously; tocilizumab may be repeated every 8 hours for up to 3 doses in a 24-hour period<br><br>If on one vasopressor: tocilizumab as in Grade 2 CRS and dexamethasone 10 mg IV every 6 hours (or methylprednisolone equivalent)<br><br>If on two vasopressors: tocilizumab as in Grade 2 CRS and dexamethasone 20 mg IV every 6 hours (or methylprednisolone equivalent)<br><br>If vasopressin and norepinephrine equivalent is $\geq 15$ mcg/minute, follow as in Grade 4 CRS | Grade 3            | In case of encephalopathy, dexamethasone 10 mg IV every 6 hours (or methylprednisolone equivalent)<br><br>In case of seizure, dexamethasone 20 mg IV every 6 hours (or methylprednisolone equivalent)<br><br>In case of brain edema is in brain stem or thalamus, methylprednisolone 1,000 mg/day in divided doses IV for 3 days followed by taper depending on clinical situation<br><br>If associated with concurrent CRS, add tocilizumab<br><br>If Grade 3 encephalopathy is persistent for > 24 hours, increase dexamethasone to 20 mg |

|         |                                                                                                                                                                                                                                                                                                                                                                                                                                                                                                                                                                                                           |         |                                                                                                                                                                                                                                                                                                                                                                                                                                                                                                                           |
|---------|-----------------------------------------------------------------------------------------------------------------------------------------------------------------------------------------------------------------------------------------------------------------------------------------------------------------------------------------------------------------------------------------------------------------------------------------------------------------------------------------------------------------------------------------------------------------------------------------------------------|---------|---------------------------------------------------------------------------------------------------------------------------------------------------------------------------------------------------------------------------------------------------------------------------------------------------------------------------------------------------------------------------------------------------------------------------------------------------------------------------------------------------------------------------|
|         | <p>If hypoxia, Tocilizumab and dexamethasone 10 mg IV every 6 hours (or methylprednisolone equivalent) if not administered previously;<br/> tocilizumab may be repeated every 8 hours for up to 3 doses in a 24-hour period</p> <p>If there is no improvement in hypoxia within 24 hours or there is rapid progression of pulmonary infiltrates or sharp increase in FiO<sub>2</sub> requirements, increase dexamethasone to 20 mg IV every 6 hours (or methylprednisolone equivalent)</p> <p>Once CRS improves to Grade 1 or less, taper and/or stop corticosteroids depending on clinical situation</p> |         | <p>IV every 6 hours (or methylprednisolone equivalent)</p> <p>Once ICANS improves to Grade 1 or less, taper and/or stop corticosteroids depending on clinical situation</p>                                                                                                                                                                                                                                                                                                                                               |
| Grade 4 | <p>Tocilizumab as in Grade 2 CRS if not administered previously;<br/> tocilizumab may be repeated every 8 hours for up to 3 doses in a 24-hour period</p> <p>Methylprednisolone 1,000 mg/day in divided doses IV for 3 days followed by rapid taper as per clinical situation</p> <p>If hypotension/hypoxia is refractory for &gt; 24 hours or if patient is deteriorating rapidly, consider additional therapies including activation of safety switches if applicable</p>                                                                                                                               | Grade 4 | <p>Methylprednisolone 1,000 mg/day in divided doses IV for 3 days followed by taper as clinically indicated; if associated with concurrent CRS, add tocilizumab</p> <p>Continue corticosteroids until improvement to less than or equal to Grade 1 ICANS and then taper and stop corticosteroids depending on clinical situation</p> <p>If Grade 4 ICANS is refractory for &gt; 24 hours or if patient is deteriorating rapidly, consider additional therapies, including activation of safety switches if applicable</p> |

**Supplementary Table 2. Factors associated with progression-free survival (PFS) on univariate analysis**

| <b>Total (N=100)</b>         | <b>N</b> | <b>Median PFS (months)</b> | <b>p-value</b>   |
|------------------------------|----------|----------------------------|------------------|
| DLBCL/HGBCL                  | 77       | 6                          | 0.57             |
| PMBCL/tFL                    | 23       | 8                          |                  |
| Age ≥ 65 years               | 36       | 9                          | 0.66             |
| < 65 years                   | 64       | 6                          |                  |
| Male                         | 74       | 7                          | 0.77             |
| Females                      | 26       | 8                          |                  |
| ECOG > 0                     | 68       | 6                          | 0.25             |
| 0                            | 32       | 11                         |                  |
| Ann Arbor Stage III-IV       | 84       | 6                          | <b>0.04</b>      |
| I-II                         | 16       | Not reached                |                  |
| Bone marrow involvement, yes | 22       | 7                          | 0.31             |
| no                           | 78       | 8                          |                  |
| IPI score 3-4                | 55       | 4                          | <b>&lt;0.001</b> |
| 0-2                          | 45       | Not reached                |                  |
| Lactate dehydrogenase > ULN  | 74       | 5                          | <b>0.002</b>     |
| normal                       | 26       | Not reached                |                  |
| Refractory                   | 89       | 7                          | 0.18             |
| Not refractory               | 11       | Not reached                |                  |
| Previous autologous SCT      | 29       | Not reached                | 0.17             |
| No previous autologous SCT   | 71       | 6                          |                  |
| Previous CAR T therapy       | 5        | 3                          | 0.41             |
| No previous CAR T therapy    | 95       | 8                          |                  |
| Prior CNS lymphoma           | 8        | 2                          | 0.95             |
| No prior CNS lymphoma        | 92       | 8                          |                  |

DLBCL, diffuse large B-cell lymphoma; HGBCL, high grade B-cell lymphoma; PMBCL, primary mediastinal B-cell lymphoma; ECOG, Eastern Cooperative Oncology Group; IPI, international prognostic index; ULN, upper limit of normal; SCT, stem cell transplant; CAR, chimeric antigen receptor; CNS, central nervous system

**Supplementary Table 3. Factors associated with overall survival (OS) on univariate analysis**

| <b>Total (N=100)</b>         | <b>N</b> | <b>Median OS (months)</b> | <b>p-value</b>   |
|------------------------------|----------|---------------------------|------------------|
| DLBCL/HGBCL                  | 77       | 16                        | 0.37             |
| PMBCL/tFL                    | 23       | Not reached               |                  |
| Age ≥ 65 years               | 36       | Not reached               | 0.81             |
| < 65 years                   | 64       | Not reached               |                  |
| Male                         | 74       | Not reached               | 0.81             |
| Females                      | 26       | Not reached               |                  |
| ECOG > 0                     | 68       | Not reached               | 0.34             |
| 0                            | 32       | Not reached               |                  |
| Ann Arbor Stage III-IV       | 84       | Not reached               | 0.19             |
| I-II                         | 16       | Not reached               |                  |
| Bone marrow involvement, yes | 22       | Not reached               | 0.76             |
| no                           | 78       | Not reached               |                  |
| IPI score 3-4                | 55       | 13                        | <b>&lt;0.001</b> |
| 0-2                          | 45       | Not reached               |                  |
| Lactate dehydrogenase > ULN  | 74       | 13                        | <b>0.001</b>     |
| normal                       | 26       | Not reached               |                  |
| Refractory disease           | 89       | 16                        | 0.12             |
| Not refractory               | 11       | Not reached               |                  |
| Previous autologous SCT      | 29       | Not reached               | 0.14             |
| No previous autologous SCT   | 71       | 16                        |                  |
| Previous CAR T therapy       | 5        | 5                         | 0.34             |
| No previous CAR T therapy    | 95       | Not reached               |                  |
| Prior CNS lymphoma           | 8        | 3                         | 0.35             |
| No prior CNS lymphoma        | 92       | Not reached               |                  |

DLBCL, diffuse large B-cell lymphoma; HGBCL, high grade B-cell lymphoma; PMBCL, primary mediastinal B-cell lymphoma; ECOG, Eastern Cooperative Oncology Group; IPI, international prognostic index; ULN, upper limit of normal; SCT, stem cell transplant; CAR, chimeric antigen receptor; CNS, central nervous system

**Supplementary Figure 1. Fraction of CD8+ T cells with central memory (CD8+CCD7+CD27+) or exhaustion (CD8+LAG3+TIM3+) phenotype in CAR T-cell infusion product determined by single cell RNA sequencing and grouped according to corticosteroid dose, duration, and timing.**

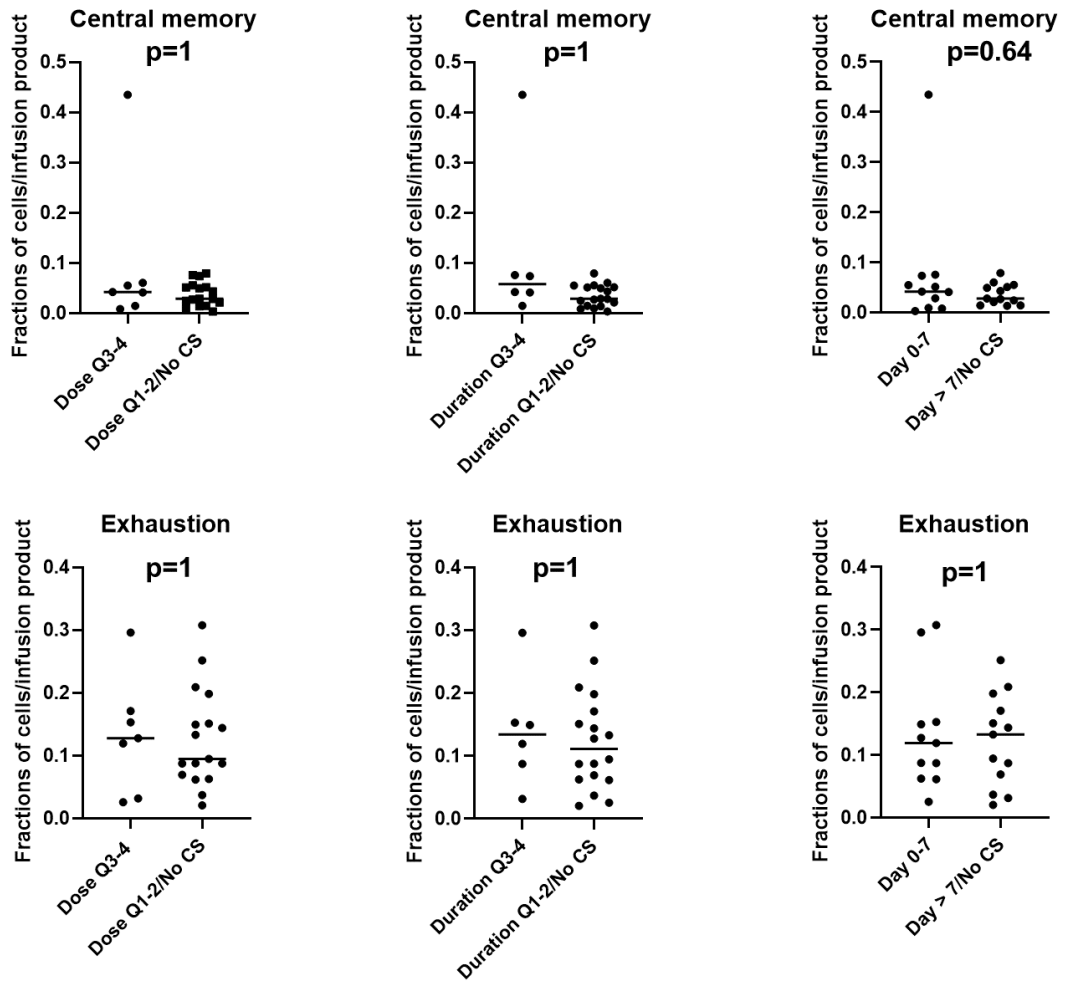

Supplementary Figure 2. CAR T-cell amplification was determined in peripheral blood samples by PCR and data is shown according to corticosteroid use, dose, duration, and timing.

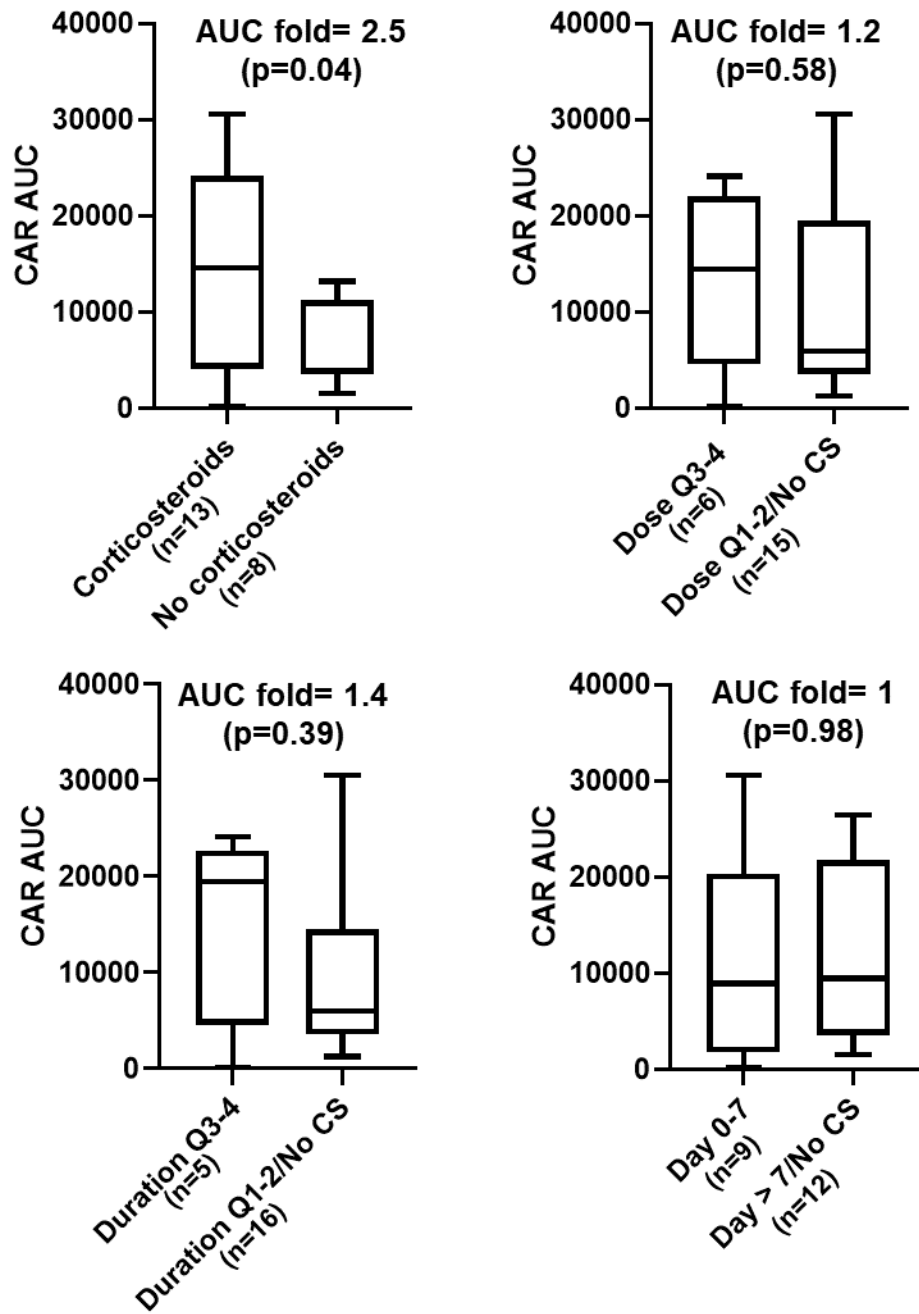



## Supplementary References

1. <https://www.mdanderson.org/documents/for-physicians/algorithms/clinical-management/clin-management-cytokine-release-web-algorithm.pdf>.
2. Mamlouk O NR, Iyer SP, Edwards A, Neelapu SS, Steiner RE, Strati P, Mandayam S, Ahmed S. . Safety and efficacy of CAR T-cell Therapy in Renal Transplant Recipients with B-cell Lymphoma. *Blood*. 2020.
3. Deng Q, Han G, Puebla-Osorio N, et al. Characteristics of anti-CD19 CAR T cell infusion products associated with efficacy and toxicity in patients with large B cell lymphomas. *Nat Med*. 2020.
4. Lee DW, Santomasso BD, Locke FL, et al. ASTCT Consensus Grading for Cytokine Release Syndrome and Neurologic Toxicity Associated with Immune Effector Cells. *Biol Blood Marrow Transplant*. 2019;25(4):625-638.
